# Supplementary material
Source: HighWire-hosted journal article supplement (https://bmjopen.bmj.com/content/12/2/e055756)
Supplement: inline-supplementary-material-1 [file inline-supplementary-material-1.pdf]

Supplementary Table 1: Search Terms in Detail

| Concept                      | Keywords (Scopus, Medline, CINAHL, Emcare, Cochrane Library)                                                                                                                                                                                                                                                                                                                                                                                                                                                                                                                                                                                     | CINAHL Headings (CINAHL)                                                                                                                                                                                                                                                                                                               | Emtree headings (Emcare)                                                                                                                                                                                                                                                                                                                  | MeSH (Medline, Cochrane Library)                                                                                                                                                                                                                              | Keywords (Informit)                                                                                                                                                                                                                                                                                                                     |
|------------------------------|--------------------------------------------------------------------------------------------------------------------------------------------------------------------------------------------------------------------------------------------------------------------------------------------------------------------------------------------------------------------------------------------------------------------------------------------------------------------------------------------------------------------------------------------------------------------------------------------------------------------------------------------------|----------------------------------------------------------------------------------------------------------------------------------------------------------------------------------------------------------------------------------------------------------------------------------------------------------------------------------------|-------------------------------------------------------------------------------------------------------------------------------------------------------------------------------------------------------------------------------------------------------------------------------------------------------------------------------------------|---------------------------------------------------------------------------------------------------------------------------------------------------------------------------------------------------------------------------------------------------------------|-----------------------------------------------------------------------------------------------------------------------------------------------------------------------------------------------------------------------------------------------------------------------------------------------------------------------------------------|
| Mothers and children         | ((mother* or mum* or mom* or women* or woman*) adj2 (group* or class* or circle* or club* or committee or facilitat* or meeting* or program*)) AND (antenatal or bub* or baby or babies or prenatal or maternal or playgroup* or play or birth* or child* or infant* or neonat* or newborn* or pregnan* or postnatal)<br>OR((antenatal or bub* or baby or babies or prenatal or maternal or playgroup* or play or birth* or child* or infant* or neonat* or newborn* or pregnan* or postnatal) adj2 (group* or class* or circle* or club* or committee or facilitat* or meeting* or program*)) AND (mother* or mum* or mom* or women* or woman*) | ((MH "Women") or (MH "maternal welfare") or (MH "Mothers+") or (MH "Reproductive Health") or (MH "Women's Health")) AND ((MH "Child") or (MH "Child welfare") or (MH "Child, Preschool") or (MH "Infant") or (MH "Child Health") or (MH "Child Health Services"))<br>OR((MH "Maternal-Child Health") or (MH "Maternal-Child Welfare")) | ((mother/ or adolescent mother/ or expectant mother/ or mother child relation/ or reproductive health/ or women's health/ or maternal welfare/ or maternal care/) AND (child health/ or child welfare/ or infant welfare/ or newborn care/ or child/ or exp infant/ or preschool child/ or toddler/))<br>OR<br>Maternal child health care | (child, preschool/ or exp infant/ or child health/ or infant health/ or infant welfare/) AND (mothers/ or women/ or pregnant women/ or reproductive health/ or exp women's health/ or maternal health/ or exp Maternal Health Services/ or maternal welfare/) | (antenatal or bub or bubs or baby or babies or prenatal or maternal or playgroup* or play or birth* or child* or infant* or neonat* or newborn* or pregnan* or postnatal) AND (mother* or mum or mums or mom or moms or women* or woman*) AND (group* or class* or circle* or club* or committee or facilitat* or meeting* or program*) |
| Participatory women's groups | (stakeholder* or community or network* or peer* or "self-help") AND (participat* or empower* or engag* or involv*)                                                                                                                                                                                                                                                                                                                                                                                                                                                                                                                               | (MH "Support Groups") or (MH "Group Processes") or (MH "Peer Group") or (MH "Community Networks") or (MH "Community Health Services") or (MH "Community Role") or (MH "Consumer Participation") or (MH "Stakeholder Participation")                                                                                                    |                                                                                                                                                                                                                                                                                                                                           | community health services/ or community networks/ or community participation/ or Stakeholder Participation/ or exp Peer Group/ or Self-Help Groups/ or Group processes/ or group structure/                                                                   | (stakeholder* or community or network* or peer* or "self help") and (participat* or empower* or engag* or involv*)                                                                                                                                                                                                                      |
